# Supplementary material
Source: PubMed Central journal article supplement (PMC2766679)
Supplement: blood-2009-05-223354_1.pdf [file blood-2009-05-223354_1.pdf]

| <i>Hfe</i> genotype/<br>stimulation<br>Gene name | <i>Hfe</i> <sup>+/+</sup><br>Control | <i>Hfe</i> <sup>-/-</sup><br>Control | <i>Hfe</i> <sup>+/+</sup><br>S. Tm. | <i>Hfe</i> <sup>-/-</sup><br>S. Tm. |
|--------------------------------------------------|--------------------------------------|--------------------------------------|-------------------------------------|-------------------------------------|
| iNOS [AU]                                        | 0.06 ± 0.09                          | 0.08 ± 0.12                          | 0.35 ± 0.30 <sup>a</sup>            | 0.38 ± 0.30 <sup>a</sup>            |
| phox-p47 [AU]                                    | 1.77 ± 1.93                          | 1.86 ± 2.00                          | 3.32 ± 0.54                         | 3.82 ± 2.11                         |
| TNF-α [AU]                                       | 0.03 ± 0.03                          | 0.03 ± 0.04                          | 0.20 ± 0.15 <sup>a</sup>            | 0.16 ± 0.15 <sup>a</sup>            |
| IL-1β [AU]                                       | 0.08 ± 0.08                          | 0.10 ± 0.09                          | 0.40 ± 0.22 <sup>a</sup>            | 0.35 ± 0.41 <sup>a</sup>            |
| IL-6 [AU]                                        | 0.04 ± 0.02                          | 0.04 ± 0.01                          | 0.14 ± 0.08 <sup>a</sup>            | 0.14 ± 0.017 <sup>a</sup>           |
| IL-10 [AU]                                       | 2.00 ± 1.23                          | 2.70 ± 1.30                          | 6.47 ± 2.05 <sup>a</sup>            | 6.41 ± 5.24 <sup>a</sup>            |
| IL-12p35 [AU]                                    | 6.47 ± 1.48                          | 8.55 ± 3.79                          | 9.83 ± 2.99                         | 11.87 ± 14.62                       |
| IL-12/23p40 [AU]                                 | 3.18 ± 3.62                          | 2.23 ± 2.70                          | 4.80 ± 1.30                         | 3.03 ± 2.49                         |
| IL-18 [AU]                                       | 1.03 ± 0.81                          | 0.86 ± 1.06                          | 1.85 ± 0.58 <sup>a</sup>            | 1.93 ± 0.82 <sup>a</sup>            |
| IL-23p19 [AU]                                    | 0.05 ± 0.04                          | 0.04 ± 0.04                          | 0.12 ± 0.06 <sup>a</sup>            | 0.08 ± 0.03 <sup>a</sup>            |
| IFN-γ [AU]                                       | 4.80 ± 1.15                          | 5.84 ± 1.36                          | 39.27 ± 32.26 <sup>a</sup>          | 29.65 ± 28.75 <sup>a</sup>          |
| IL-4 [AU]                                        | 4.50 ± 4.28                          | 3.36 ± 0.78                          | 2.08 ± 1.40 <sup>a</sup>            | 1.59 ± 1.01 <sup>a</sup>            |
| IL-13 [AU]                                       | 5.14 ± 2.99                          | 4.80 ± 1.91                          | 1.51 ± 1.45 <sup>a</sup>            | 1.10 ± 0.94 <sup>a</sup>            |
| IL-17A [AU]                                      | 0.21 ± 0.17                          | 0.18 ± 0.12                          | 0.90 ± 0.62 <sup>a</sup>            | 0.76 ± 0.65 <sup>a</sup>            |
