# Supplementary material
Source: PubMed Central journal article supplement (PMC2766679)
Supplement: blood-2009-05-223354_2.pdf [file blood-2009-05-223354_2.pdf]

| <i>Hfe</i> genotype/<br>stimulation<br>Parameter | <i>Hfe</i> <sup>+/+</sup><br>Control | <i>Hfe</i> <sup>-/-</sup><br>Control | <i>Hfe</i> <sup>+/+</sup><br>S. Tm. | <i>Hfe</i> <sup>-/-</sup><br>S. Tm. |
|--------------------------------------------------|--------------------------------------|--------------------------------------|-------------------------------------|-------------------------------------|
| WBC                                              | 6.20                                 | 7.69                                 | 5.85                                | 5.81                                |
| [10 <sup>3</sup> /μl]                            | [4.86 – 8.35]                        | [7.00 – 9.03]                        | [4.53 – 7.41]                       | [4.08 – 6.91]                       |
| RBC                                              | 10.05                                | 10.18                                | 9.37                                | 10.08                               |
| [10 <sup>6</sup> /μl]                            | [8.90 – 10.69]                       | [9.76 – 10.87]                       | [8.15 – 10.39]                      | [8.63 – 11.95]                      |
| Hb                                               | 15.14                                | 15.60                                | 14.48                               | 15.96                               |
| [g/dl]                                           | [14.30 – 15.90]                      | [15.30 – 16.00]                      | [12.10 – 15.70]                     | [14.40 – 18.80]                     |
| MCV                                              | 44.96                                | 45.60                                | 45.28                               | 48.78                               |
| [fl]                                             | [43.70 – 47.00]                      | [44.90 – 46.50]                      | [43.40 – 47.00]                     | [47.70 – 50.10]                     |
