# Supplementary material
Source: PubMed Central journal article supplement (PMC2766679)
Supplement: blood-2009-05-223354_3.pdf [file blood-2009-05-223354_3.pdf]

| Gene name    | Forward primer<br>(5'→3')    | Taqman probe<br>(FAM-5'→3'-BHQ1)         | Reverse primer<br>(5'→3')      |
|--------------|------------------------------|------------------------------------------|--------------------------------|
| Dmt1         | GGACTGTGGACGCTCGGTAA         | CATCTCGAAAGTCTGCTGAGCGAAGA               | AATGTTGCCACCGCTGGT             |
| TfR1         | CGCTTTGGGTGCTGGTG            | CCCACACTGGACTTCGCCGCA                    | GGGCAAGTTTCAACAGAAGACC         |
| Fpn1         | CTACCATTAGAAGGATTGACCAGCT    | CAACATCCTGGCCCCCATGGC                    | CAAATGTCATAATCTGGCCGA          |
| Hamp         | GGCAGACATTGCGATACCAAT        | CCAACTTCCCCATCTGCATCTTCTGC               | TGCAACAGATACCACACTGGGAA        |
| Lcn2         | GCCTCAAGGACGACAACATCA        | TTCTCTGTCCCCACCGACCAATGC                 | CACCACCCATTAGTTGTCAAT          |
| LcnR         | GGCGATTTCTACAGCGAATGA        | CCTCTTCCTGTTTTATGGCTGGCCTGGT             | CTATCAGCCACCGTGCAGACT          |
| Hmox1        | GTGATGGAGCGTCCACAGC          | TGGTGGCCTCCTTCAAGG                       | CGACAGCATGCCCCAGGATTTGTC       |
| Flvcr        | ATCTGGAACCTGTGCAGAAACA       | CCCCTTTGTTCTCCTGCTGGTCAGTTATG            | ATTGAATAAAAATGCTCCAGTCATGAT    |
| iNOS         | CAGCTGGGCTGTACAAAACCTT       | CGG GCA GCC TGT GAG ACC TTT GA           | CATTGGAAGTGAAGCGTTTCG          |
| phox-p47     | GAGGCGGAGGATCCGG             | CAACTACGCAGGTGAACCGTATGTAACCATCA         | TCTTCAACAGCAGCGTACGC           |
| TNF-α        | TTCTATGGCCAGACCCTCA          | CTCAGATCATCTTCTCAAAAATTCGAGTGACAAGC      | TTGCTACGACGTGGGCTACA           |
| IL-1β        | GATGAGGACATGAGCACCTTCTT      | CATCTTTGAAGAAGAGCCCATCCTCTGTGA           | GCAGGTTATCATCATCATCCCA         |
| IL-6         | TGTTCTCTGGGAAATCGTGGA        | ATGAGAAAAGAGTTGTGCAATGGCAATTCTG          | AAGTGCATCATCGTTGTTCCATACA      |
| IL-10        | CCAGAGCCACATGCTCCTAGA        | TGCGGACTGCCTTCAGCCAGG                    | TGGTCCTTTGTGTTGAAAGAAAGTCT     |
| IL-12 P35    | TACTAGAGAGACTTCTCCACAACAAGAG | AGACGTCTTTGATGATGACCCTGTGCCT             | TCTGGTACATCTTCAAGTCCTCATAGA    |
| IL-12/23 P40 | GACCATCACTGTCAAAGAGTTTCTAGAT | CCACTCACATCTGCTGCCACAAGAAG               | AGGAAAGTCTTGTGTTTTGAAATTTTTTAA |
| IL-18        | GACTCTTGCGTCAACTTCAAGGA      | TGATGTTTATTGACAACACGCTTTACTTTATACCTGAAGA | TTGTCTGATTCCAGGTCTCCATT        |
| IL-23 P19    | AGCGGGACATATGAATCTACTAAGAGA  | CCAGTTCTGCTTGCAAAGGATCCGC                | GTCCTAGTAGGGAGGTGTGAAGTTG      |
| Mip-1α       | AGCTGACACCCCGACTGC           | TGCTGCTTCTCCTACAGCCGGAAGAT               | GTCAACGATGAATTGGCGTG           |
| Mcp-1        | CTTCTGGGCCTGCTGTTCA          | CTCAGCCAGATGCAGTTAACGCCCC                | CCAGCCTACTCATTGGGATCA          |
| TGF-β        | TGACGTCCTGAGGTTGTACGG        | TTCAGCGCTCACTGCTTTGTGACAG                | GGTTCATGTCATGGATGGTGC          |
| MHC-II       | GAGCATCCCAGCCTGAAGA          | ACTCAGACTGTGCCCTCCACTCCA                 | CGATGCCGCTCAACATCTT            |
| IFN-γ        | TCAAGTGGCATAGATGTGGAAGAA     | TCACCATCCTTTTGCCAGTTCTCCAG               | TGGCTCTGCAGGATTTTCATG          |
| IL-4         | ACAGGAGAAGGGACGCCAT          | TCCTCACAGCAACGAAGAACCACA                 | GAAGCCCTACAGACGAGTCA           |
| IL-13        | GGAGCTGAGCAACATCACACA        | CGGGTTCTGTGTAGCCCTGGATTCC                | GGTCCCTGTAGATGGCATTGCA         |
| IL-17A       | GCTCCAGAAGGCCCTCAG           | ACCTCAACCGTTCCACGTCACCCCTG               | CTTTCCTCCGCATTGACA             |
| Hprt         | GACCGGTCCCCTCATGC            | ACCCGAGTCCCAGCGTCGTC                     | TCATAACCTGGTTCATCATCGC         |
